# Supplementary material for: Secondary structure of end group functionalized oligomeric-l-lysines: investigations of solvent and structure dependent helicity
Source: Royal Society of Chemistry journal article supplement (doi:10.1039/c9ra03099a), 2019-01-01
Supplement: c9ra03099a1.pdf [file c9ra03099a1.pdf]

Electronic Supplementary Information (ESI) for:

## Secondary structure of end group functionalized oligomeric-L-lysines: investigations of solvent and structure dependent helicity

Merve Basak Canalp,<sup>a</sup> Annette Meister<sup>b</sup> and Wolfgang H. Binder<sup>c\*</sup>

### 1. Synthesis of 11-Amino-Undecene

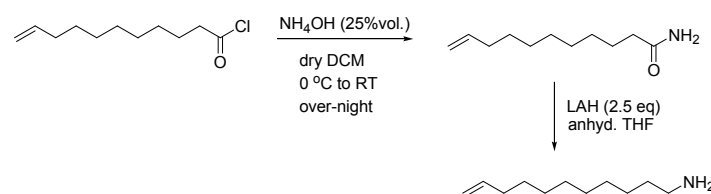

Scheme 15. Synthesis of 11-amino undecene.

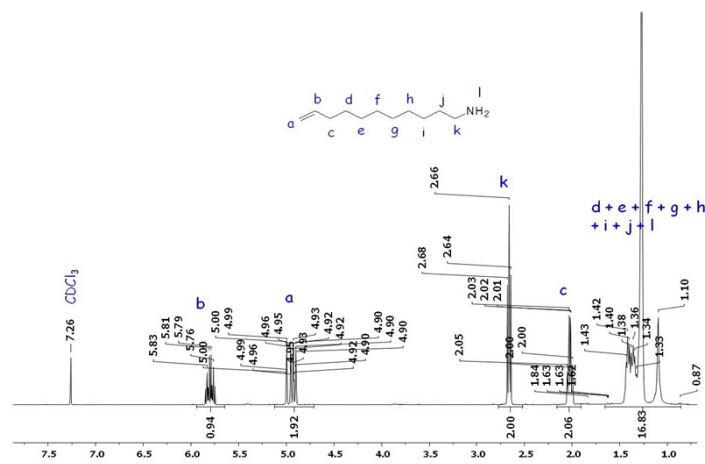

Figure 1S. <sup>1</sup>H-NMR of 11-undecene in  $\text{CDCl}_3$ .

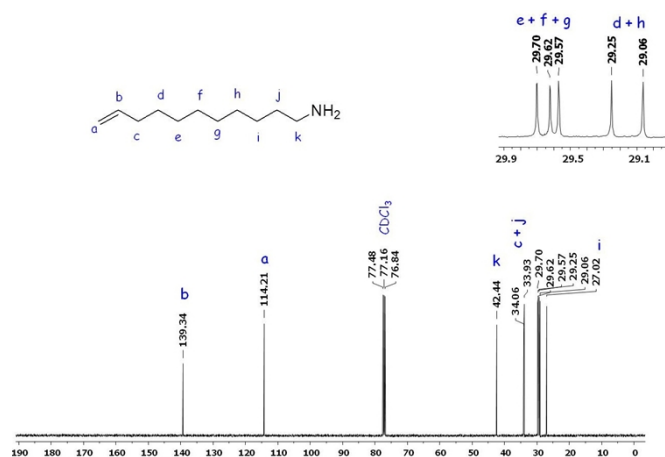

Figure 2S. <sup>13</sup>C-NMR of 11-undecene in  $\text{CDCl}_3$ .

## 2. N-carboxyanhydride of N-carboxybenzyl-L-Lysine, NCA(Z)

In a three-necked round bottom flask equipped with a magnetic stir bar and a reflux condenser,  $N_{\epsilon}$ -carboxybenzyl-L-lysine (11.50 g, 41.03 mmol) and  $\alpha$ -pinene (11.74 g, 86.15 mmol) were dissolved in 90 mL of dry ethyl acetate and stirred for around 30 minutes at room temperature. During that time, triphosgene (5.41 g, 18.23 mmol) which was dissolved in 25 mL of ethyl acetate and added slowly into the reaction mixture with the help of a syringe. The reaction mixture was refluxed at 85°C for around 3 hours. After removing 2/3 of the ethyl acetate by distillation, recrystallization was done in n-heptane for couple of time. The obtained pure NCA product was dried under vacuum and stored in a refrigerator.  $^1\text{H-NMR}$  (DMSO- $d_6$ , 400 MHz)  $\delta$  (ppm): 9.06 (s, 1H, -NH), 7.39 – 7.28 (m, 5H,  $\phi$ -H), 7.24 (t, 1H, -NH,  $^3J_{\text{H,H}} = 5.5$  Hz), 5.00 (s, 2H, -O-CH $_2$ -), 4.46 – 4.39 (m, 1H, -CH), 2.99 (q, 2H, -CH $_2$ ,  $^3J_{\text{H,H}} = 6.4$  Hz), 1.80 – 1.21 (m, 6H, -CH $_2$ ).  $^{13}\text{C-NMR}$  (DMSO- $d_6$ , 125 MHz)  $\delta$  (ppm): 171.6 (C=O), 156.1 (C=O), 151.9 (C=O), 137.2 ( $\phi$ ), 128.31 - 27.7 ( $\phi$ ), 65.1 (O-CH $_2$ -), 57.0 (CH), 40.1 (CH $_2$ ), 30.6 (CH $_2$ ), 28.7 (CH $_2$ ), 21.6 (CH $_2$ ). MS (ESI-ToF, MeOH):  $m/z$  calc. = 341.122 [M + Cl] $^-$ , 305.150 [M - H] $^-$ ,  $m/z$  exp. = 341.101 [M + Cl] $^-$ , 305.125 [M - H] $^-$ .

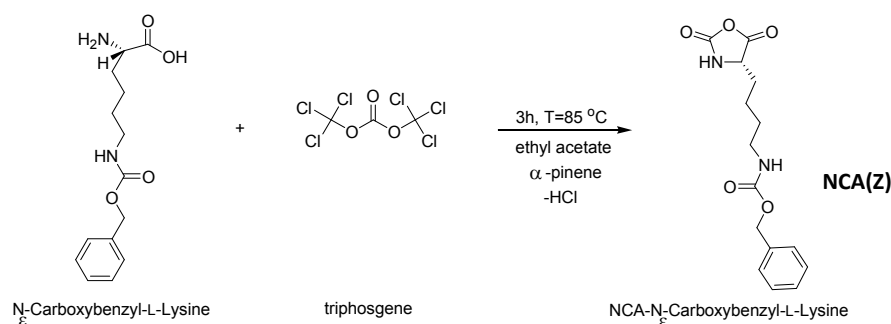

Scheme 2S. Synthesis of N-carboxyanhydride of N-carboxybenzyl-L-Lysine, NCA(Z).

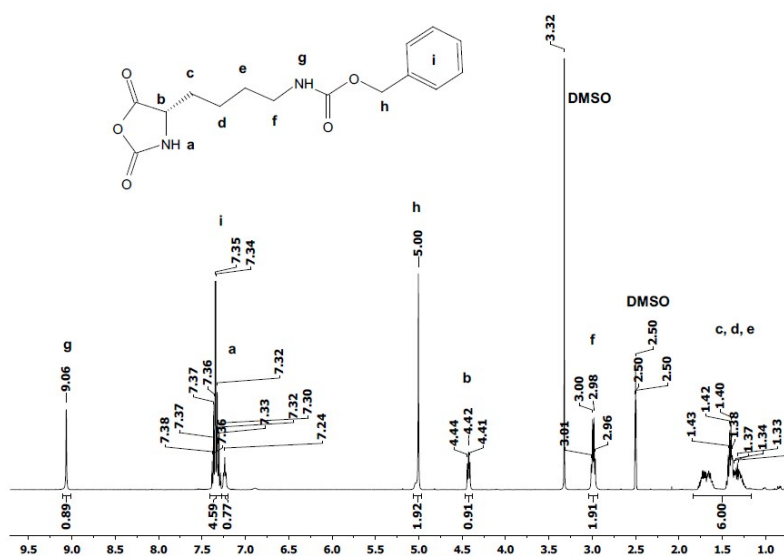

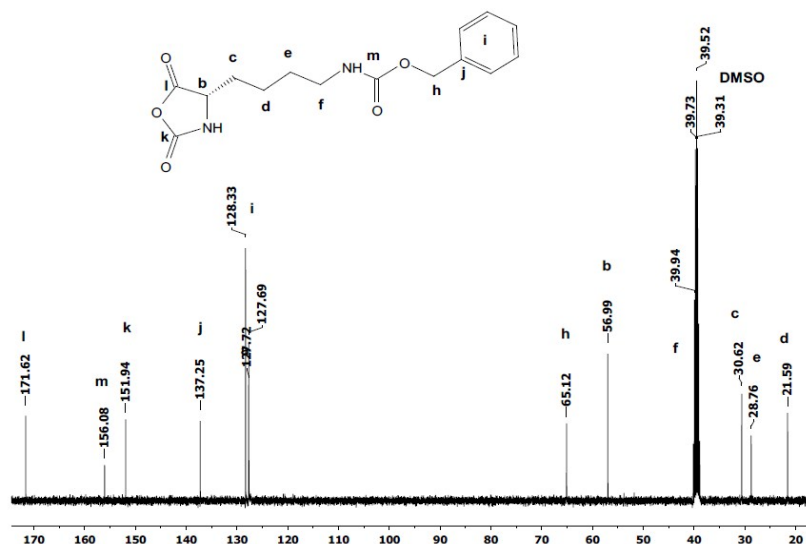

Figure 4S.  $^{13}\text{C}$ -NMR of NCA(Z) in  $\text{DMSO-d}_6$ .

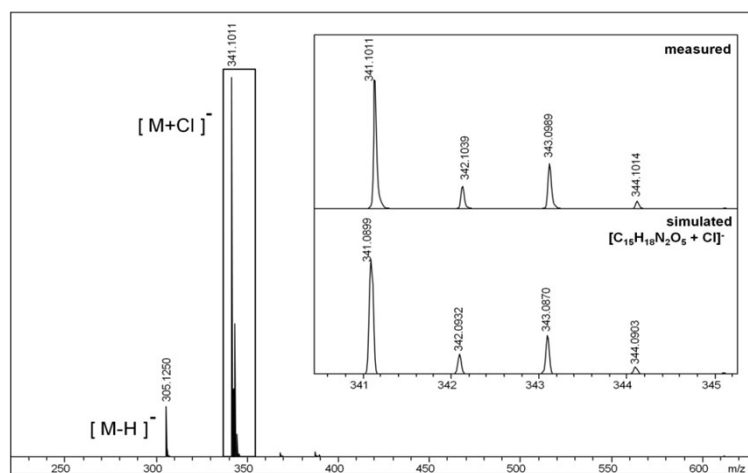

Figure 5S. ESI-ToF MS of NCA(Z).

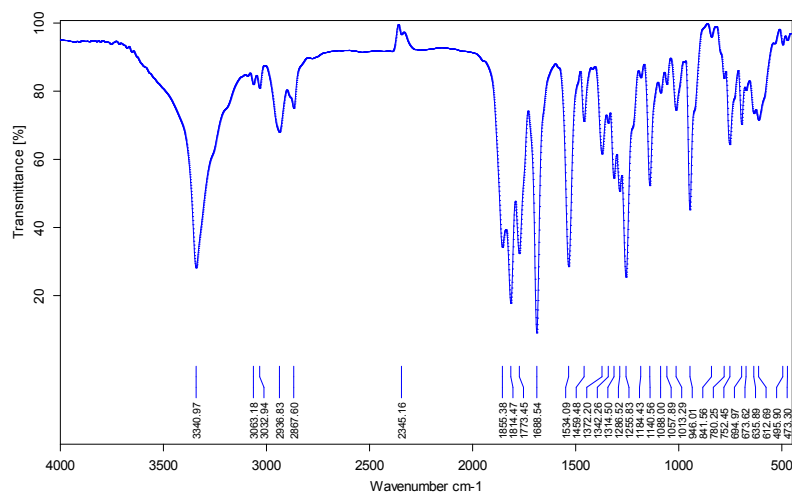

Figure 6S. AT-IR spectra of NCA(Z).

### 3. N-carboxyanhydride of N-trifluoroaceticacid-L-Lysine, NCA(TFA)

*N*<sub>ε</sub>-trifluoroacetyl-L-lysine (10.00 g, 41.29 mmol) and α-pinene (11.81 g, 86.71 mmol) were dissolved in 78 mL of dry ethyl acetate. Triphosgene (5.51 g, 18.58 mmol) was dissolved in 25 mL of ethyl acetate. <sup>1</sup>H-NMR (DMSO-d<sub>6</sub>, 400 MHz) δ (ppm): 9.46 – 9.09 (*m*, 2H, -NH), 4.45 (*dd*, 1H, CH, <sup>3,3</sup>J<sub>H,H</sub> = 7.3, 5.1 Hz), 3.19 (*dd*, 2H, CH<sub>2</sub>, <sup>3,3</sup>J<sub>H,H</sub> = 13.0, 6.7 Hz), 1.85 – 1.17 (*m*, 6H, CH<sub>2</sub>). <sup>13</sup>C-NMR (DMSO-d<sub>6</sub>, 125 MHz) δ (ppm): 171.6 (C=O), 156.3 (C=O), 151.9 (C=O), 124.2 (CF<sub>3</sub>), 56.9 (CH), 40.0 (CH<sub>2</sub>), 30.5 (CH<sub>2</sub>), 27.6 (CH<sub>2</sub>), 21.6 (CH<sub>2</sub>). MS (ESI-ToF, MeOH): *m/z calc.* = 303.035 [M + Cl]<sup>-</sup>, 267.059 [M - H]<sup>-</sup>; *m/z exp.* = 303.054 [M + Cl]<sup>-</sup>, 267.078 [M - H]<sup>-</sup>.

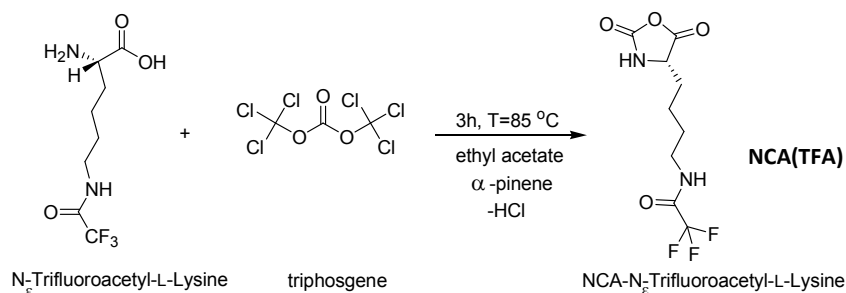

Scheme 3S. Synthesis of N-Carboxyanhydride of N-Trifluoroaceticacid-L-Lysine, NCA(TFA).

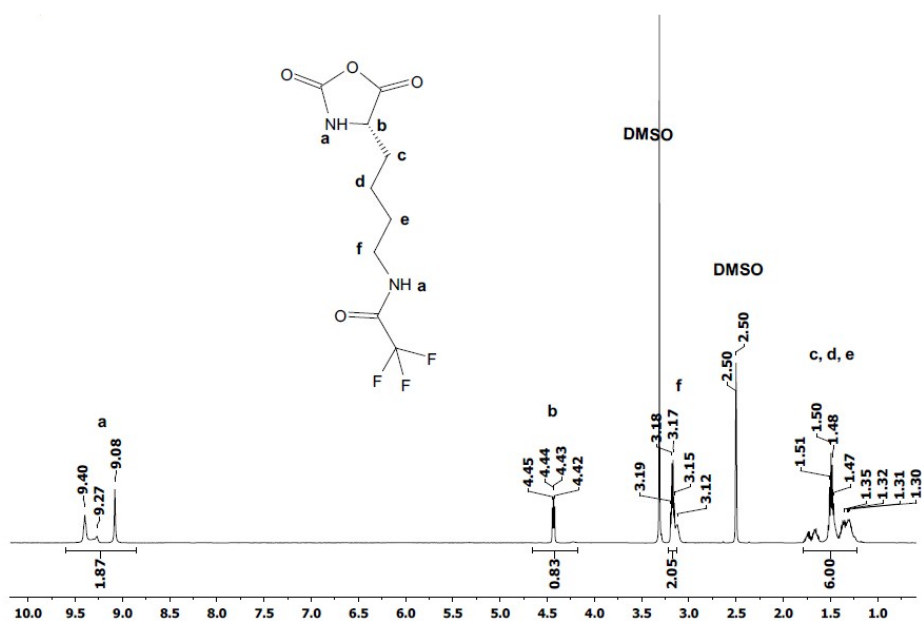

Figure 7S. <sup>1</sup>H-NMR of NCA(TFA) in DMSO-d<sub>6</sub>.

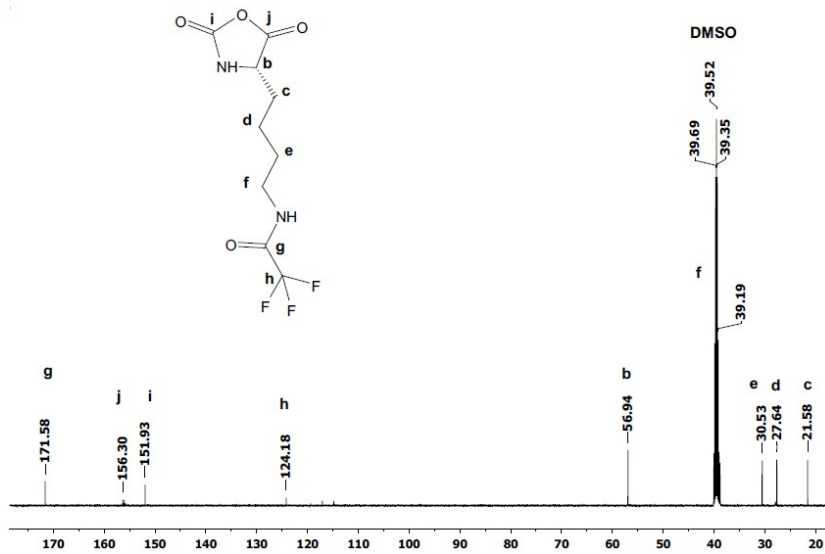

Figure 8S. <sup>13</sup>C-NMR of NCA(TFA) in DMSO-d<sub>6</sub>.

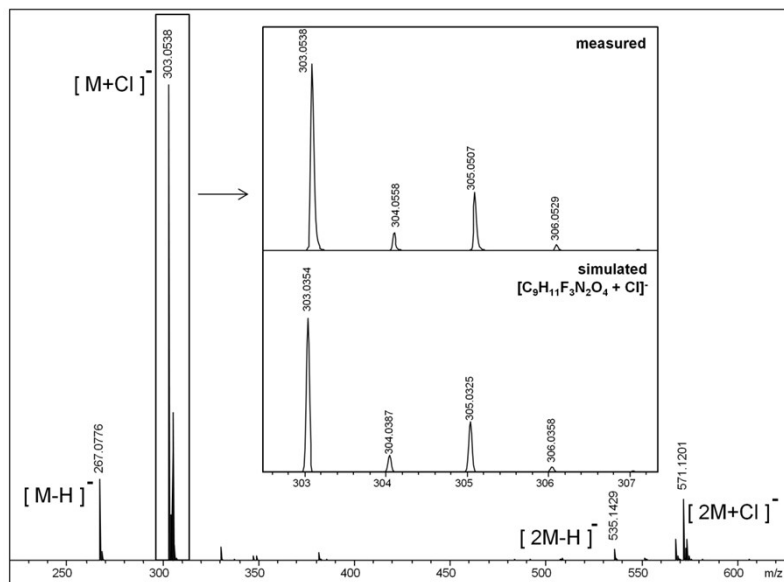

Figure 9S. ESI-ToF MS of NCA(TFA).



5. N-carboxyanhydride ring opening polymerization of NCA(TFA) with 11-amino-undecene, OK(TFA)

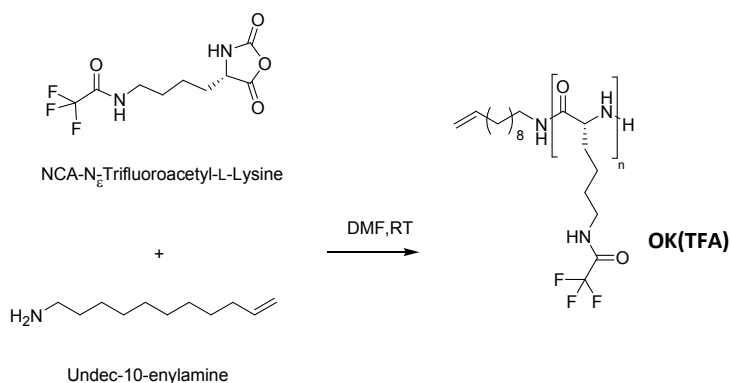

Scheme 5S. Synthesis of OK(TFA).

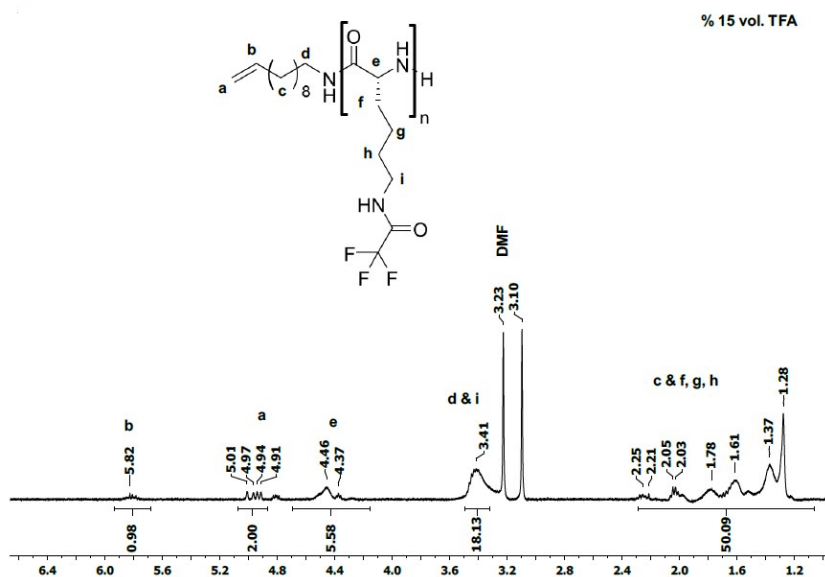

Figure 12S.  $^1\text{H-NMR}$  of OK(TFA) in  $\text{CDCl}_3$  (15% vol. TFA added).

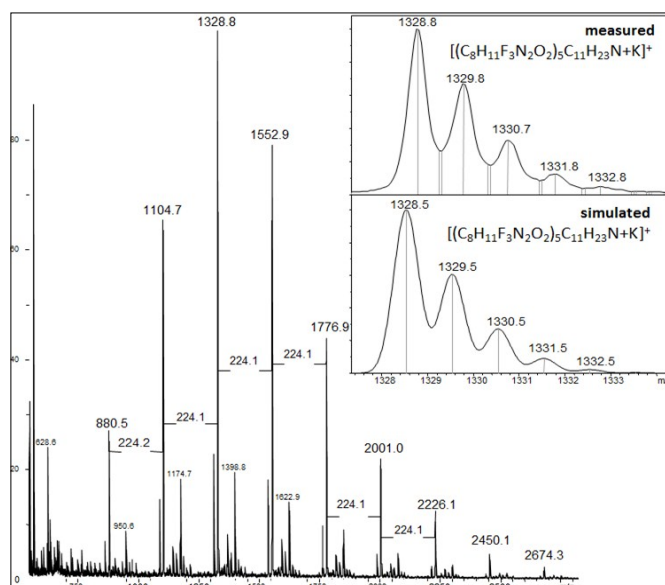

Figure 13S. MALDI-ToF MS of OK(TFA).

## 6. N-terminus functionalization of oligo-carboxybenzyl-L-lysine, N-OK(Z)

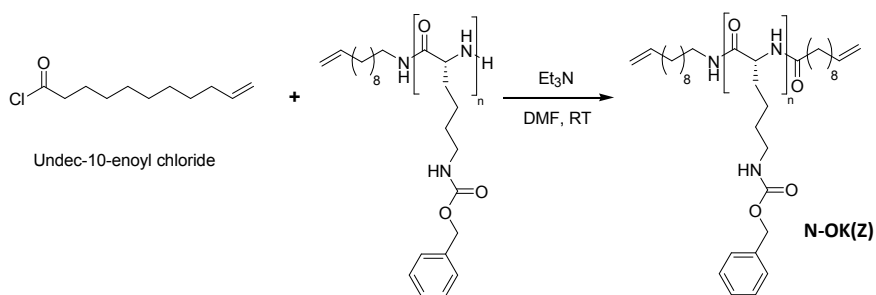

Scheme 6S. Synthesis of N-OK(Z).

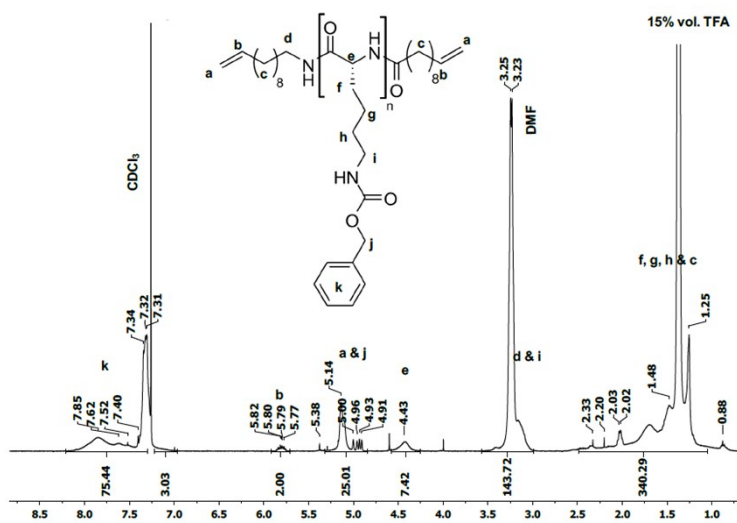

Figure 14S. <sup>1</sup>H-NMR of N-OK(Z) in CDCl<sub>3</sub> (15% vol. TFA added).

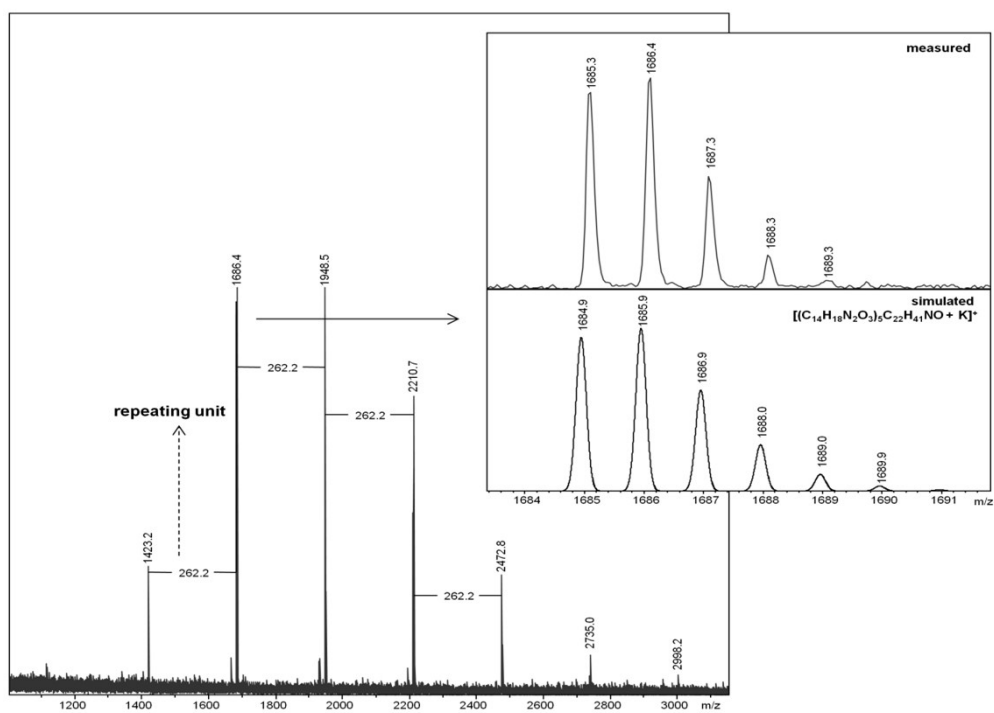

Figure 15S. MALDI-ToF MS of N-OK(Z).



## 7. N-Terminus Functionalization of oligo-trifluoroacetyl-L-lysine, N-OK(TFA)

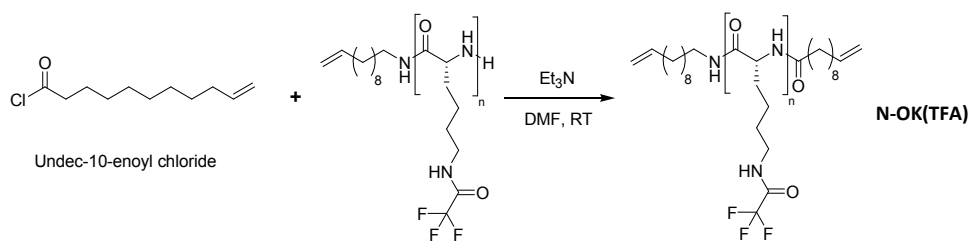

Scheme 7S. Synthesis of **N-OK(TFA)**.

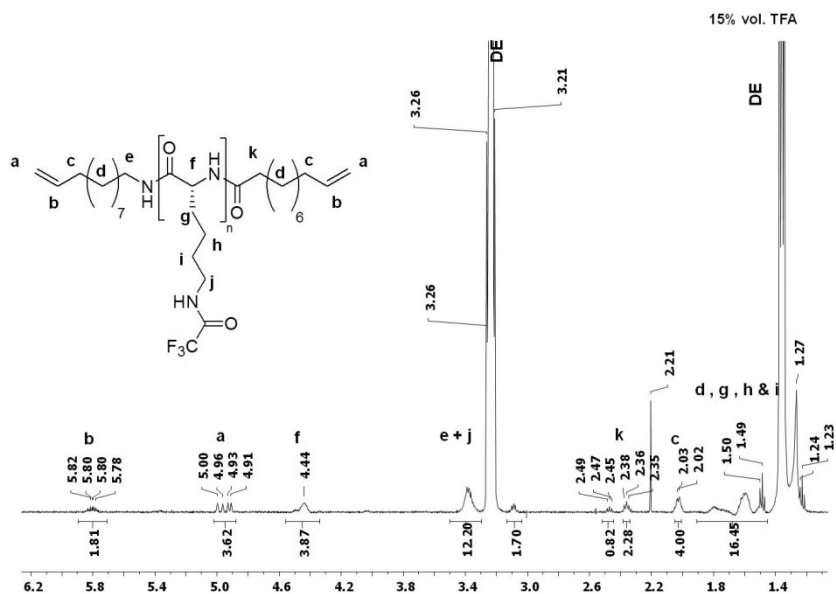

Figure 16S. <sup>1</sup>H-NMR of **N-OK(TFA)** in CDCl<sub>3</sub> (15% vol. TFA added).

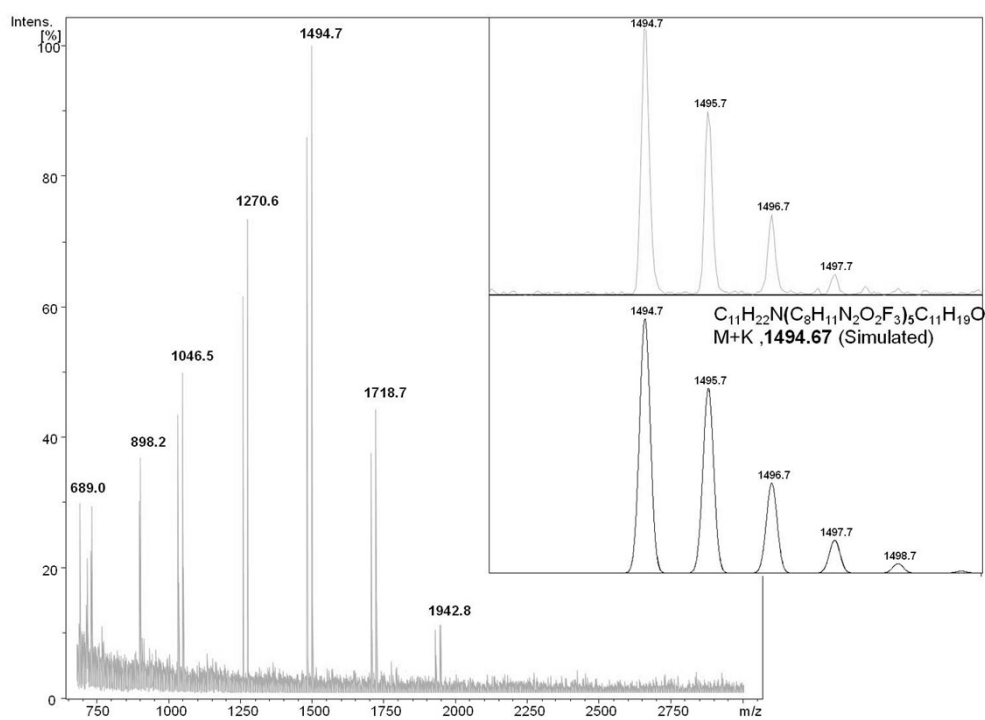

Figure 17S. MALDI-ToF MS of **N-OK(TFA)**.



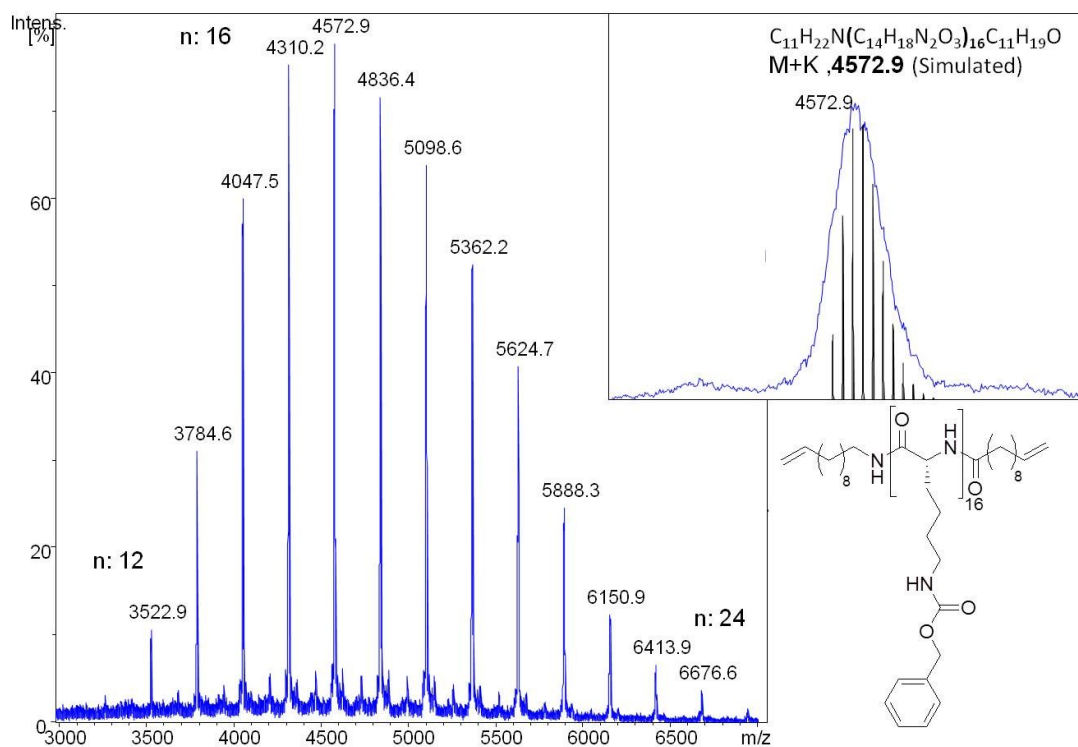

Figure 20S. MALDI-ToF MS of fraction of N-OK(Z), f14.

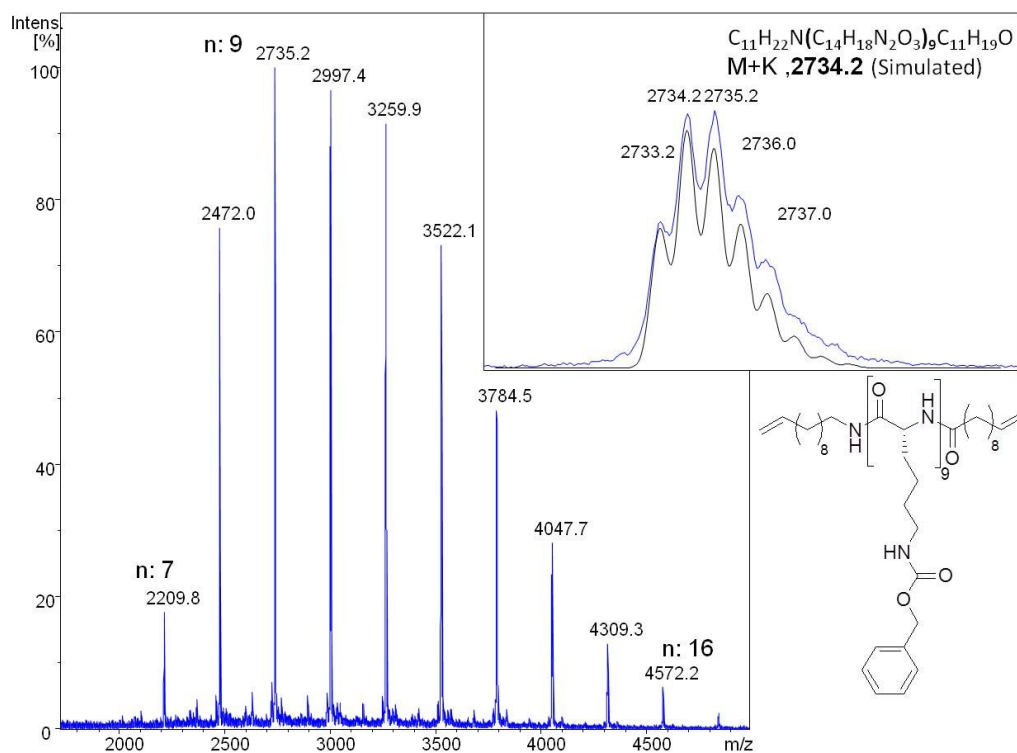

Figure 21S. MALDI-ToF MS of fraction of N-OK(Z), f15.





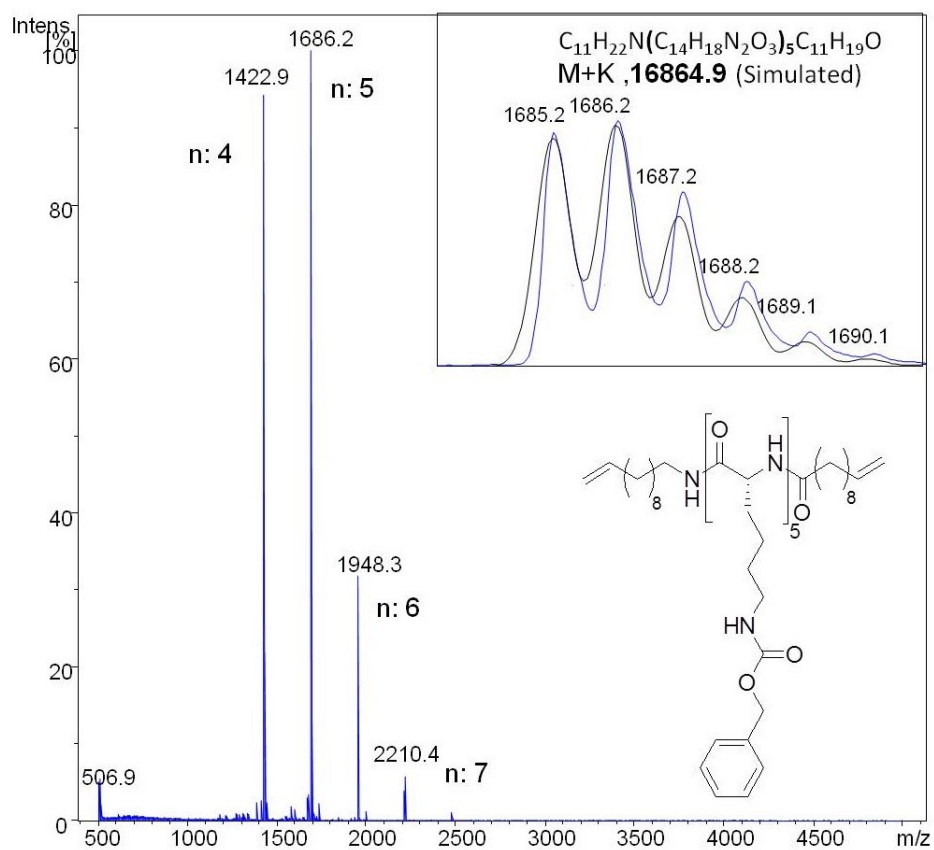

Figure 26S. MALDI-ToF MS of fraction of N-OK(Z), **f23**.

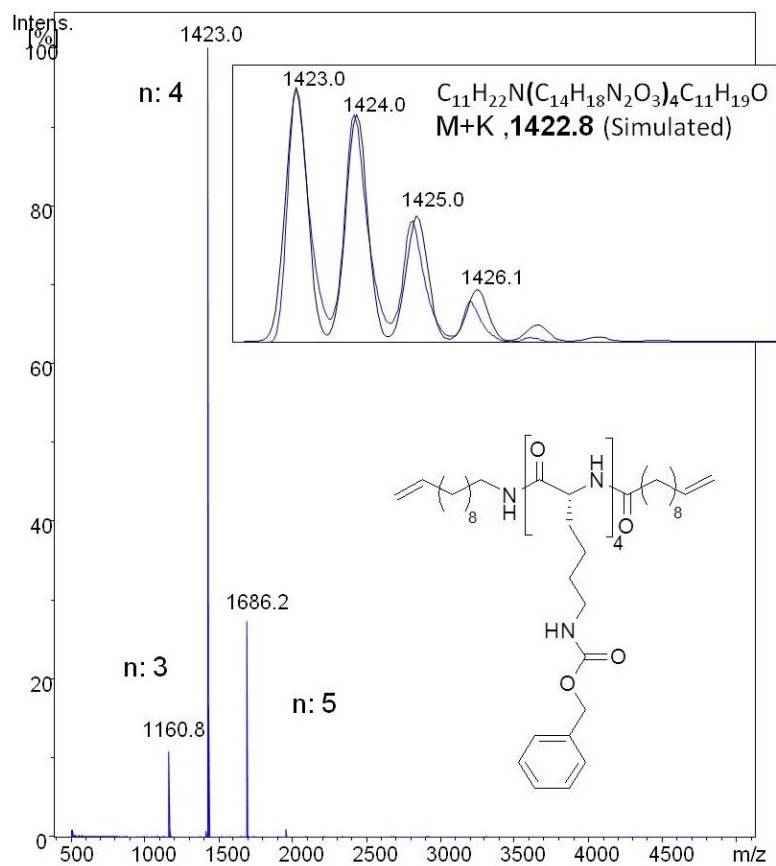

Figure 27S. MALDI-ToF MS of fraction of N-OK(Z), **f25**.

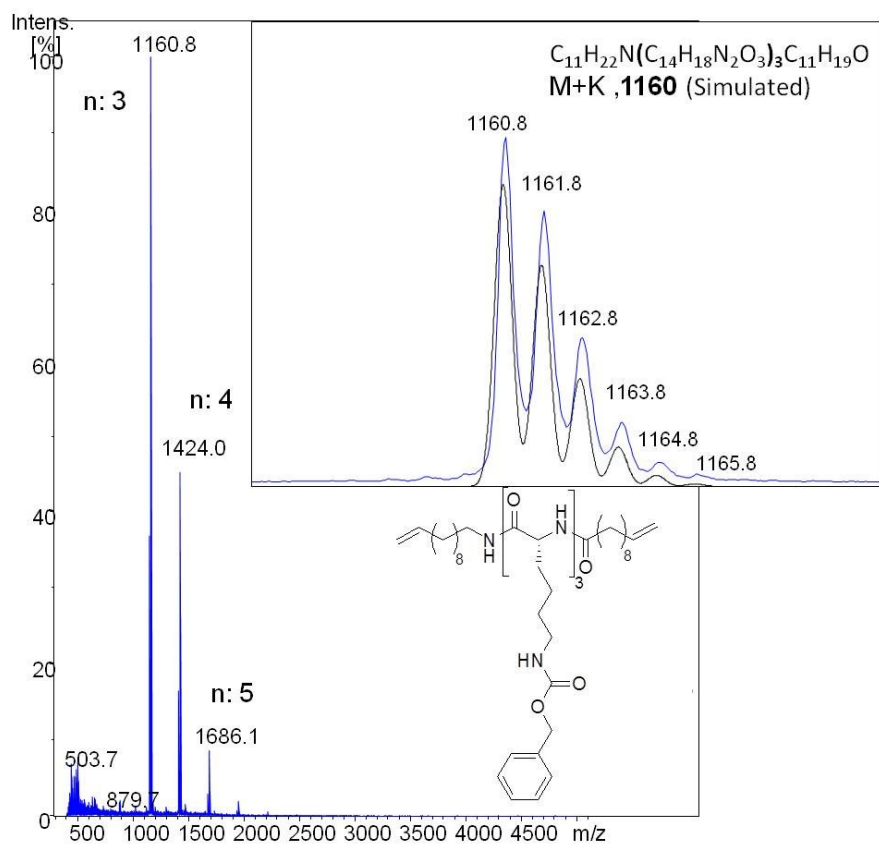

Figure 28S. MALDI-ToF MS of fraction of N-OK(Z), f27.

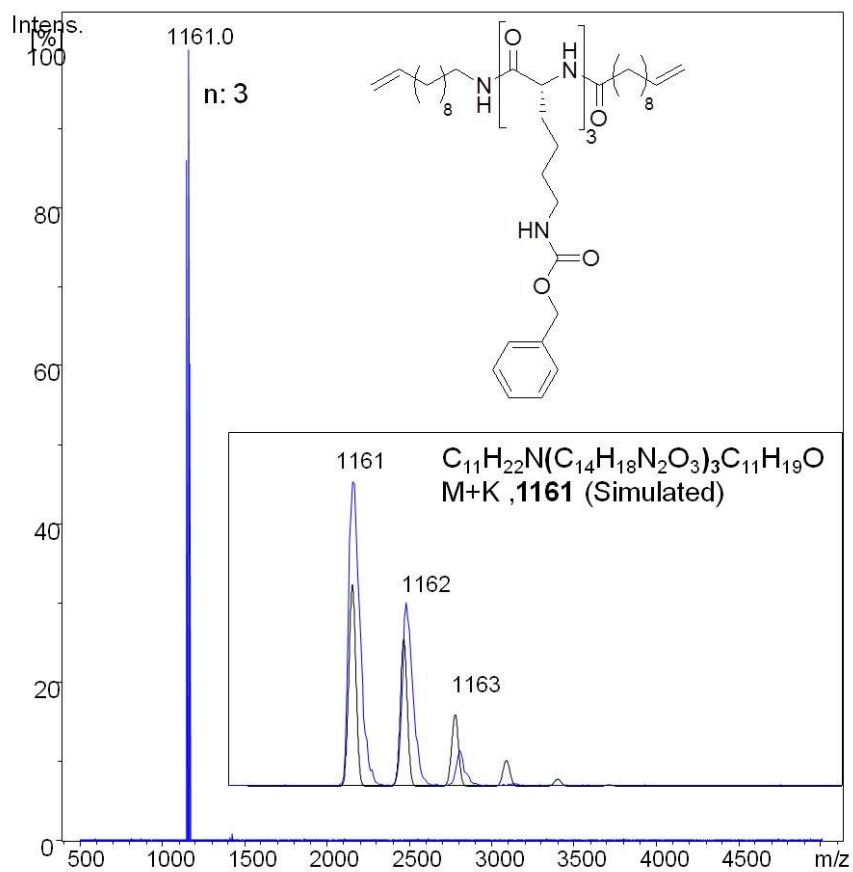

Figure 29S. MALDI-ToF MS of fraction of N-OK(Z), f28.

## 10. Preparative GPC analyses of N-OK(TFA)

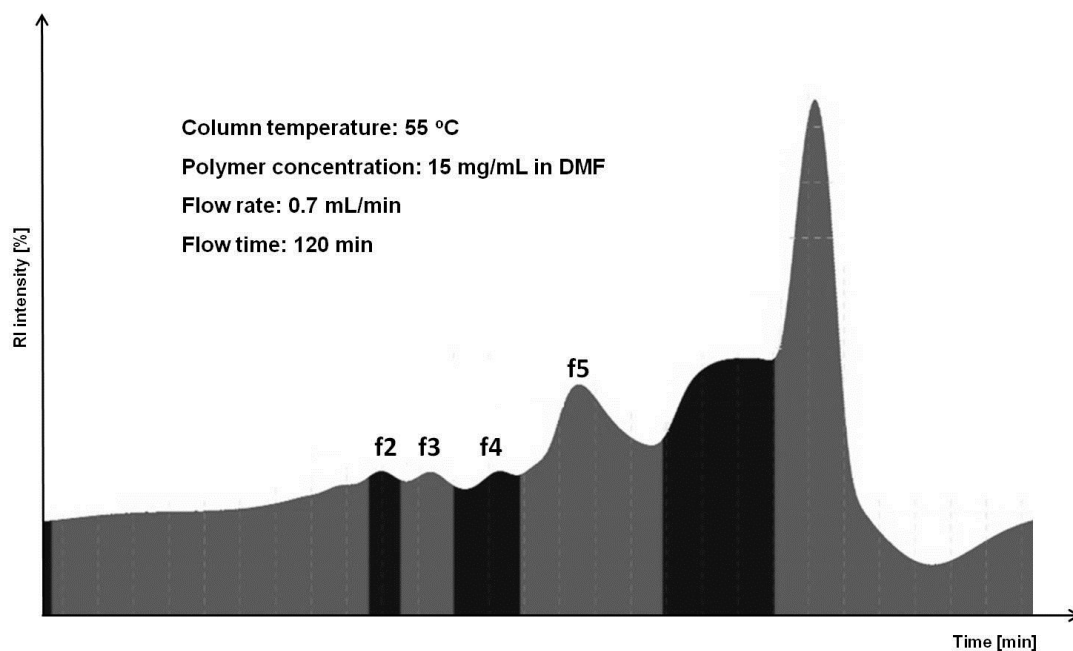

Figure 30S. Preparative GPC trace of N-OK(TFA) along with the selected fractions.

## 11. MALDI-ToF analyses of fractions of N-OK(TFA)

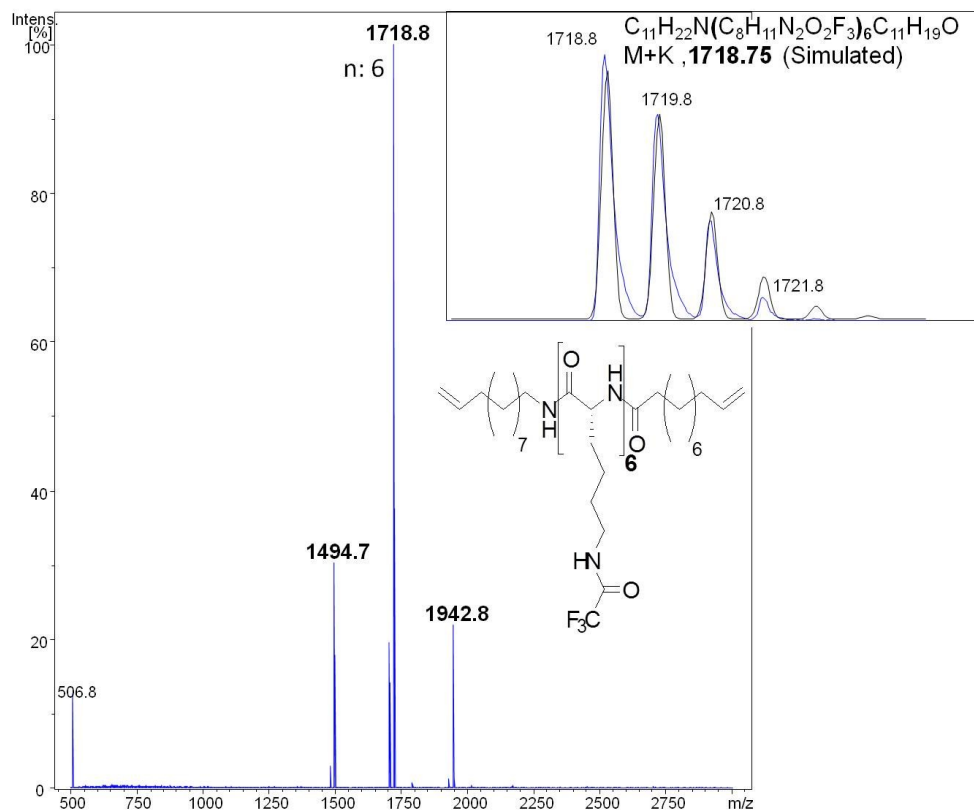

Figure 31S. MALDI-ToF MS of fraction of N-OK(TFA), f2.



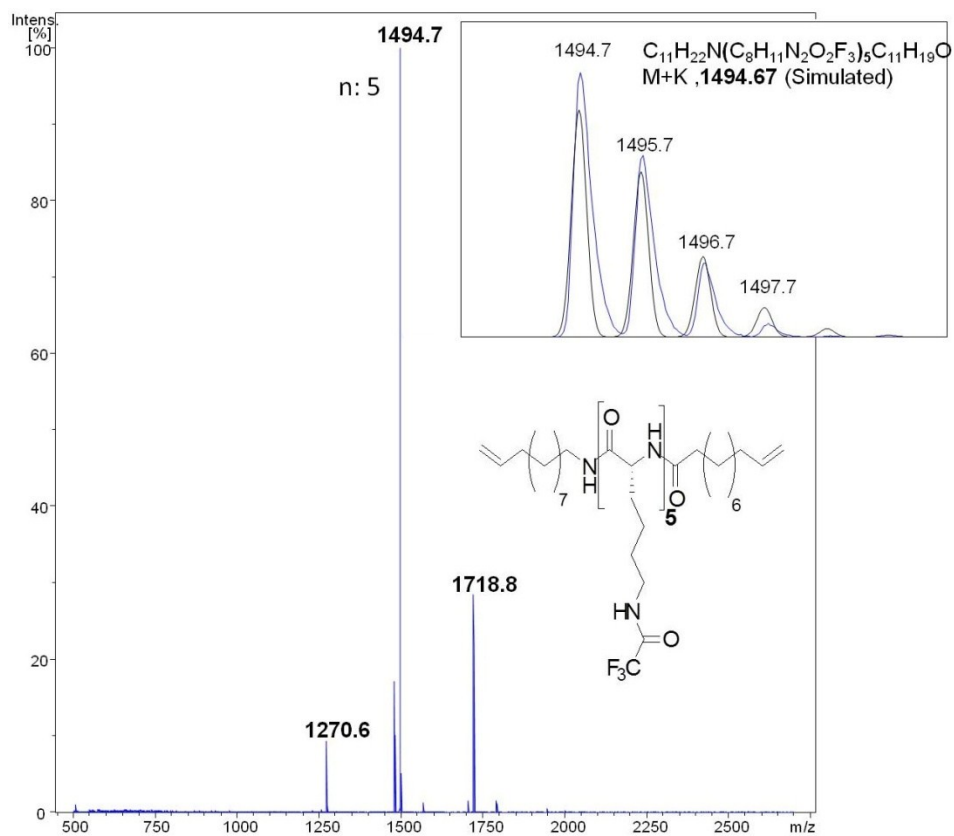

Figure 32S. MALDI-ToF MS of fraction of N-OK(TFA), **f3**.

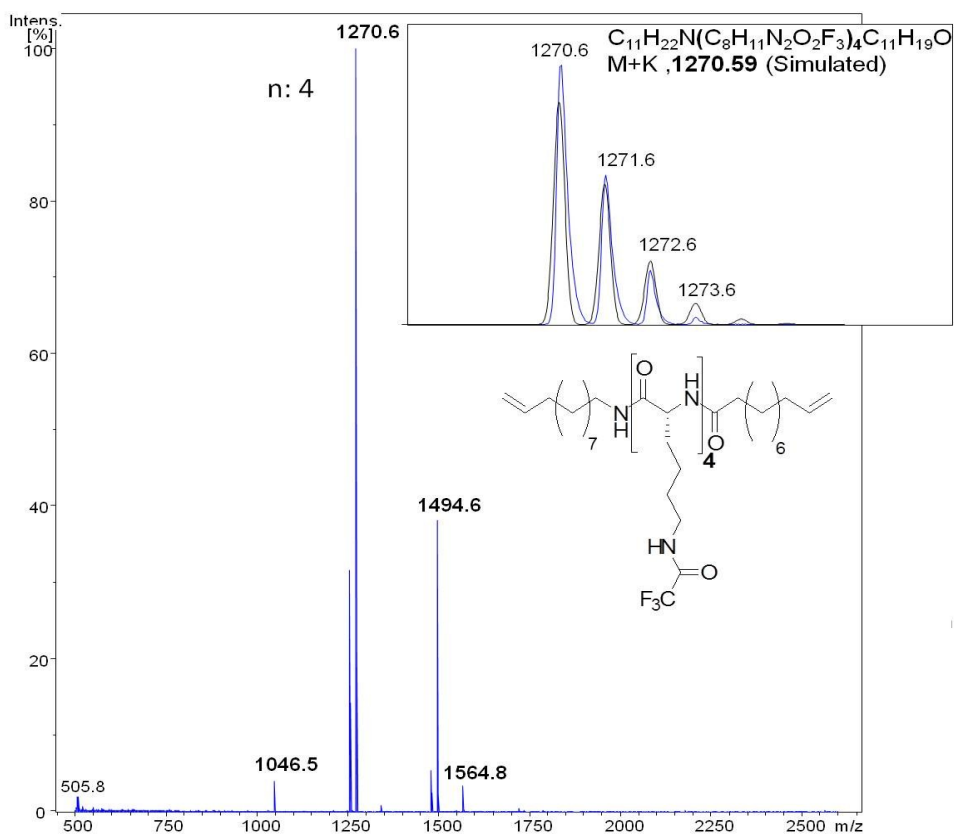

Figure 33S. MALDI-ToF MS of fraction of N-OK(TFA), **f4**.

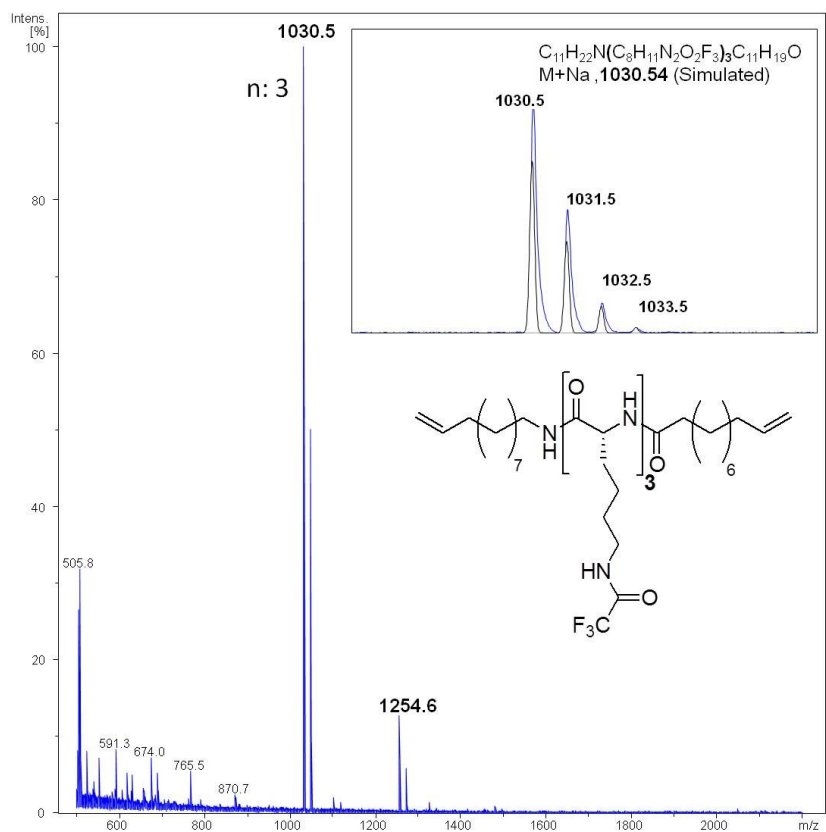

Figure 34S. MALDI-ToF MS of fraction of N-OK(TFA), **f5**.

## 12. <sup>1</sup>H-NMR analysis of fraction of N-OK(TFA)

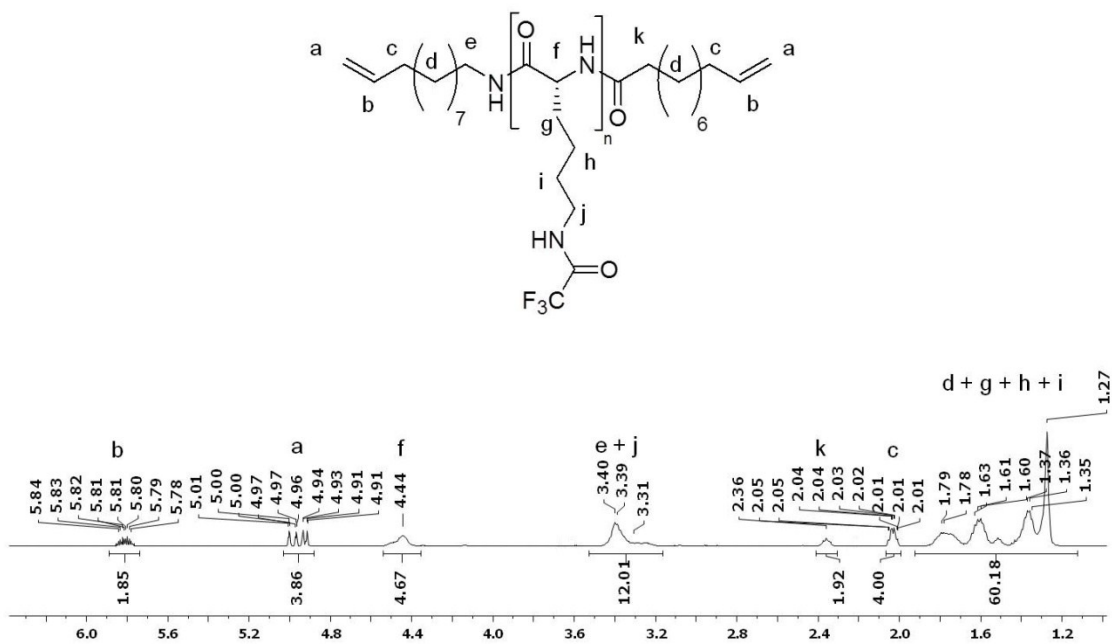

Figure 35S. <sup>1</sup>H-NMR of fraction of N-OK(TFA), **f3** in CDCl<sub>3</sub> (15% vol. TFA).

### 13. CD spectroscopy analyses of oligomers

The measured CD data were reported as ellipticity ( $\theta$ ) [mdeg]. The molar ellipticity ( $[\theta]$ ) [deg cm<sup>2</sup> dmol<sup>-1</sup>], was obtained according to the Equation 1S stated below:

$$[\theta] = \frac{\theta \times M_{\text{repeating unit}}}{10 \times c \times l} \quad [\text{deg cm}^2 \text{ dmol}^{-1}] \quad \text{(Equation 1S)}$$

where,  $c$  is the concentration of the sample polymer (mg/mL),  $l$  is the UV-cuvette cell diameter (0.1 cm) and  $M_{\text{repeating unit}}$  is the molecular weight of the repeating unit of the polymer (g/mol).

The percentage values of the  $\alpha$ -helicity of the samples were calculated with Equation 1.

### 14. TEM analyses of various samples

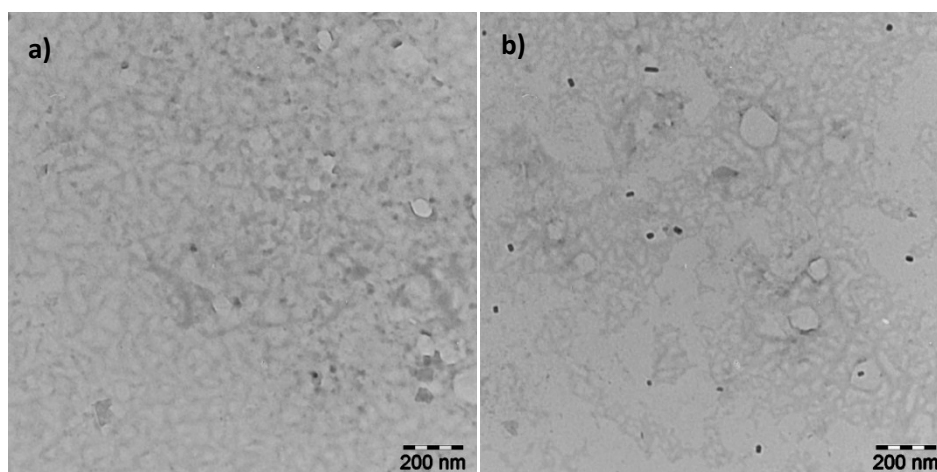

Figure 36S. TEM images of **N-OK(Z)-2** a) in TFE and b) in HFIP.

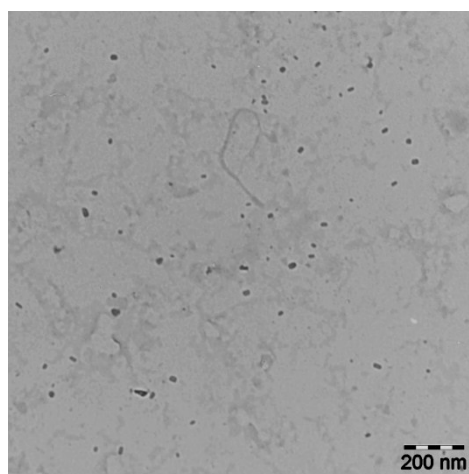

Figure 37S. TEM image of **f19** in HFIP.

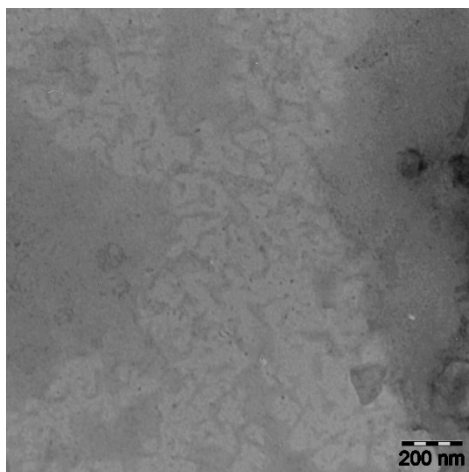

Figure 38S. TEM image of **f14** in TFE.

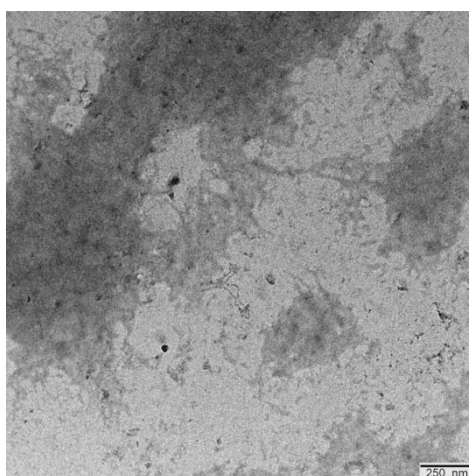

Figure 39S. TEM image of **f15** in TFE.

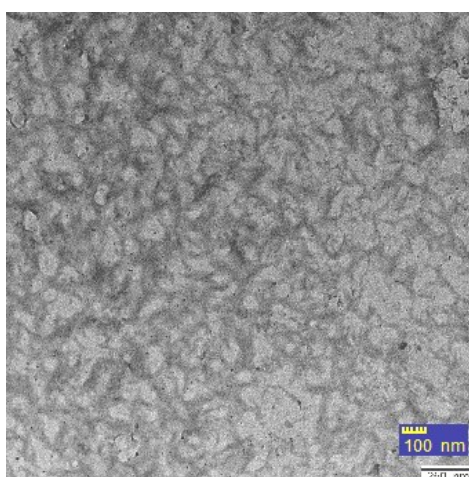

Figure 40S. TEM image of **f25** in TFE.
